# Supplementary material for: Distinct gene-selective roles for a network of core promoter factors in Drosophila neural stem cell identity
Source: PubMed Central journal article supplement (PMC6504003; doi:10.1242/bio.042168), 2019-04-15
Supplement: biolopen-8-042168-s1.pdf [file biolopen-8-042168-s1.pdf]

Figure S1

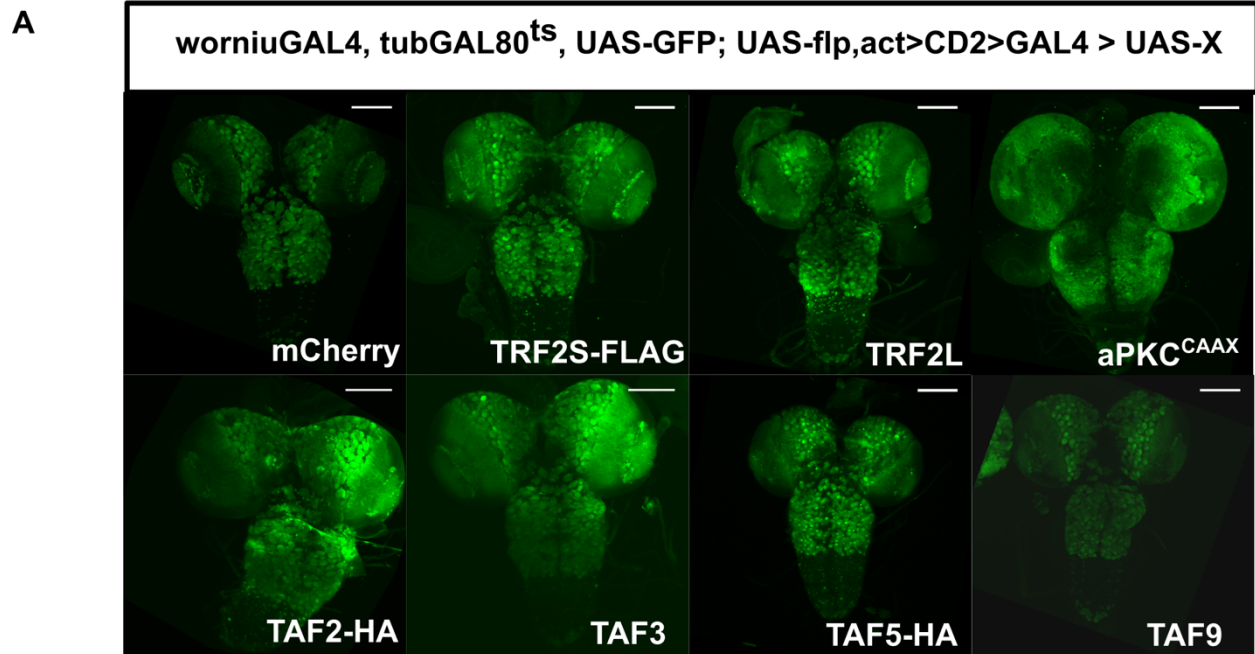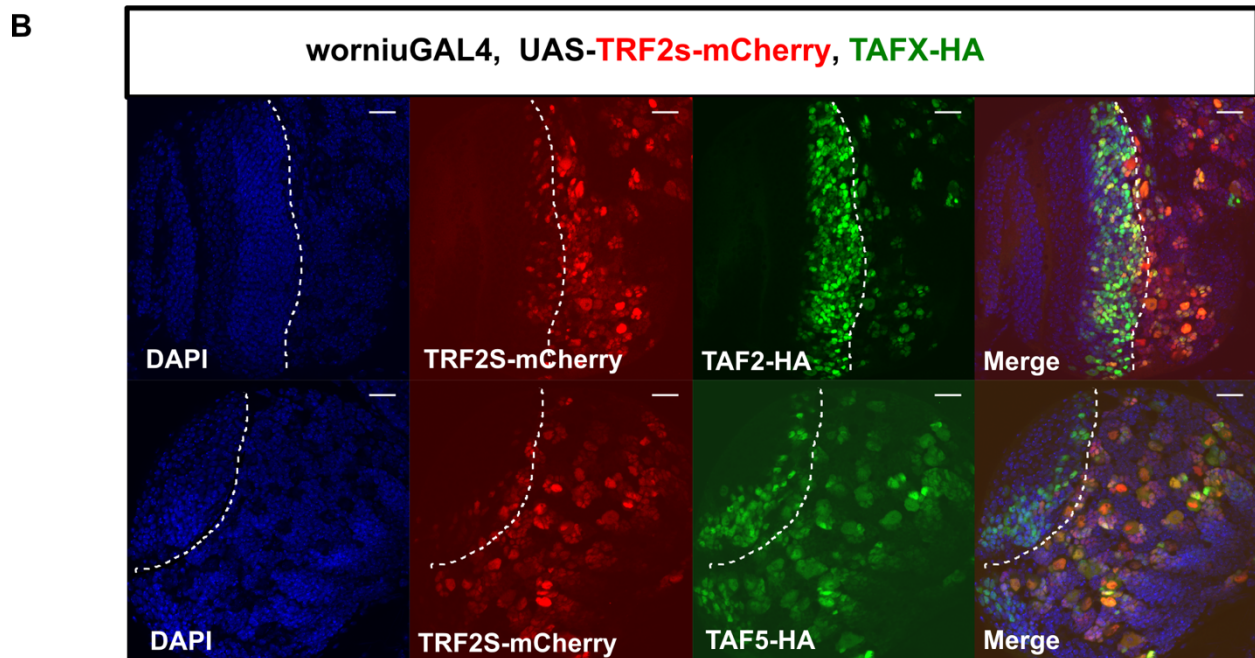

**Figure S1. Overexpression of single TAFs or TRF2 does not result in overt**

**phenotypes.** (A) Listed transgenes were overexpressed with a *worniu*-GAL4, *tubGAL80<sup>ts</sup>*, UASGFP; UAS-*flp*, *act>CD2>GAL4* driver. UAS-*aPKC<sup>CAAX</sup>* was used as a positive control for increased NSCs. (B) Overexpression of TRF2-mCherry, TAF2-HA, TAF5-HA were confirmed with staining for mCherry (red) and HA (green). The white dotted line demarcates the optic lobe (left)/ central brain (right) boundary.

Scale bars represent 50  $\mu\text{m}$  in A and 20  $\mu\text{m}$  in B.

Figure S2

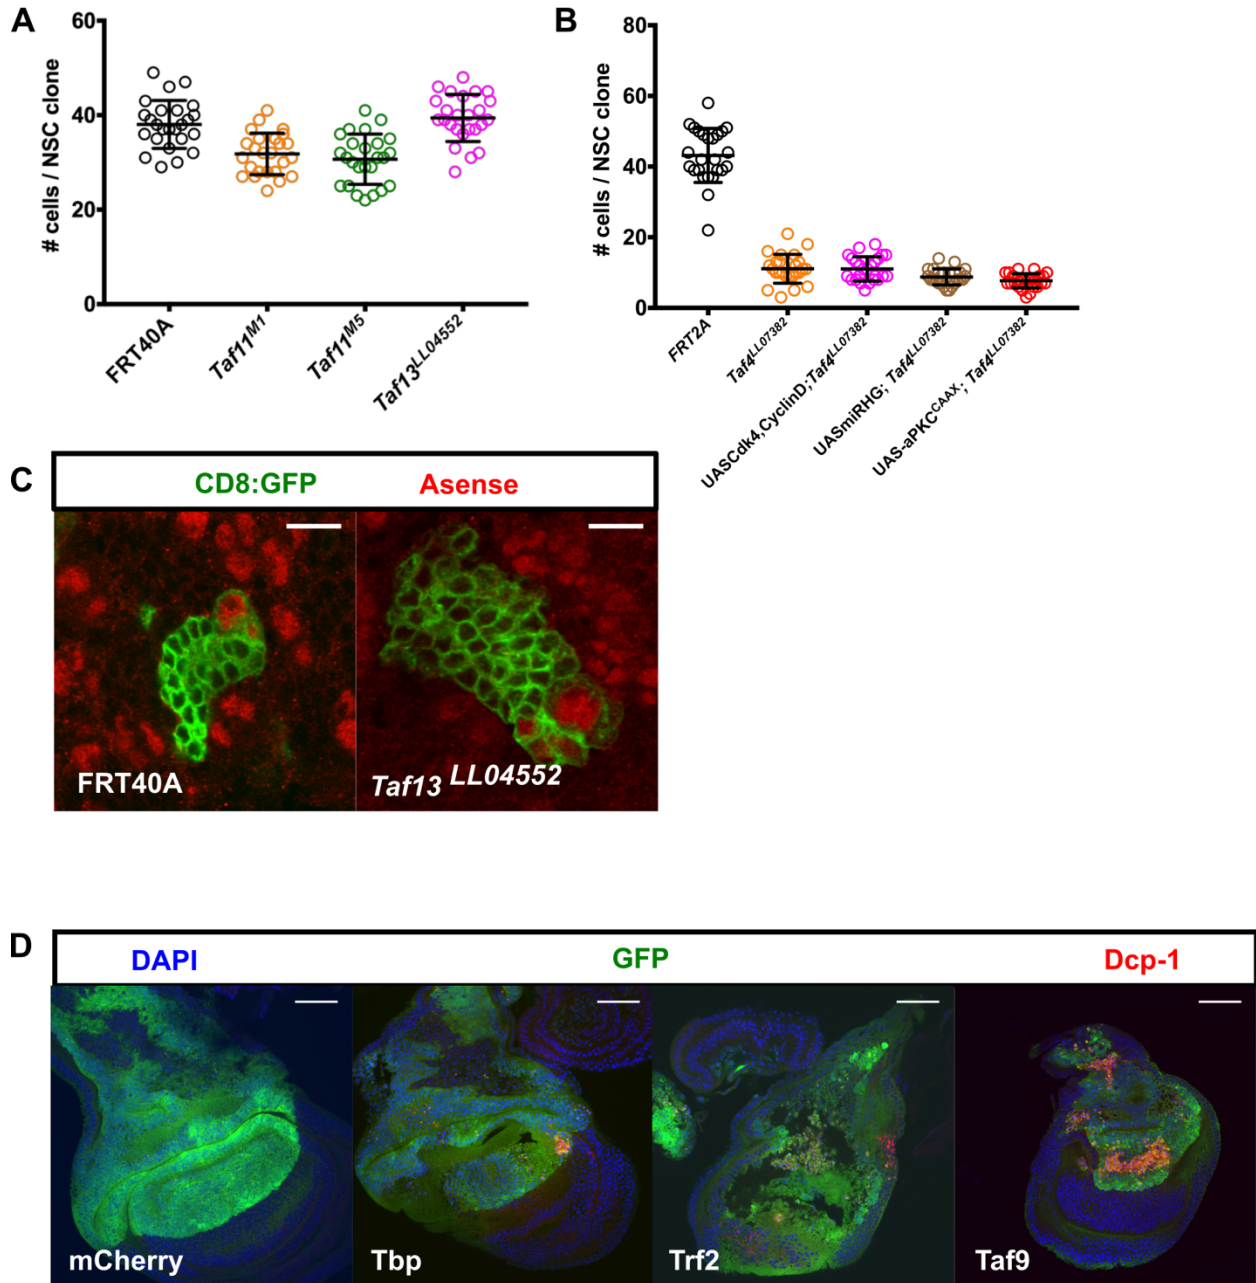

**Figure S2. Analysis of alleles of non-NSC-TAFs and survival function for NSC-**

**TAFs in epithelial cells.** (A) *Taf11<sup>M1</sup>* and *Taf11<sup>M5</sup>* clones exhibit a very modest decrease in clone size (p value <0.0001) whereas *Taf13<sup>LL04552</sup>* clones were indistinguishable from control clones (p value = 0.6465). (B) Overexpression of CyclinD, Cdk4,UASmiRHG or UAS-aPKC<sup>CAAX</sup> does not rescue the small clone size of *Taf4<sup>LL07382</sup>* mutant NSCs. Clones were compared to either the control (FRT2A) or the *Taf4<sup>LL07382</sup>* mutant clones using a one-way ANOVA with Dunnett's multiple comparison test. (C) *Taf13<sup>LL04552</sup>* NSCs express normal levels of the type I NSC marker Asense. Control (FRT40A) or mutant (*Taf13<sup>LL04552</sup>*) clones are marked with a membrane-tethered GFP, CD8:GFP. (D) Expression of GFP (green) driven by apterous-GAL4, tubGAL80<sup>ts</sup> and cleaved caspase (red; Dcp-1) in wing discs expressing listed RNAi transgenes induced for 48h, targeting mCherry (control), TBP, TRF2 and TAF9. Scale bars represent 10µm in C and 50 µm in D.



Figure S3

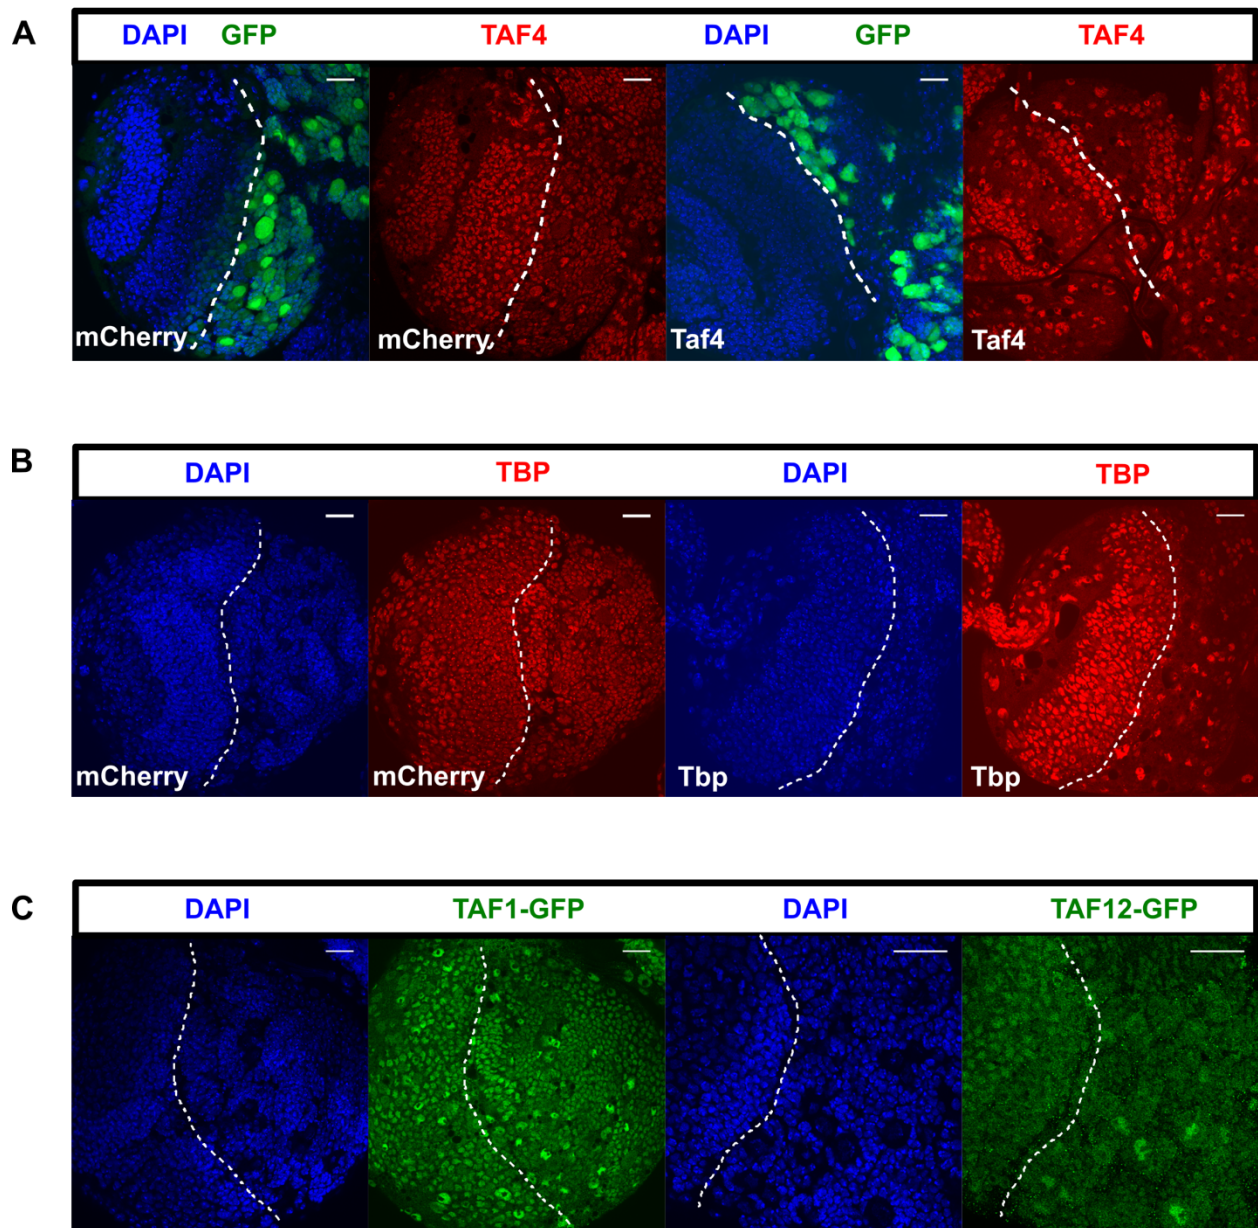

**Figure S3. Endogenous expression of selected TAFs and TBP.**

(A). Endogenous TAF4 is expressed ubiquitously in the central brain and expression of a TAF4 RNAi transgene markedly decreases TAF4 levels in GFP-expressing cells. (B) Endogenous TBP is expressed ubiquitously in the central brain and expression of a TBP RNAi transgene markedly decreases TBP levels. (C) TAF1 and TAF12 are expressed ubiquitously in the central brain as reported by TAF1-GFP and TAF12-GFP fusion proteins. The white dotted line demarcates the optic lobe (left)/ central brain (right) boundary and scale bars represent 20  $\mu\text{m}$ .

## Figure S4

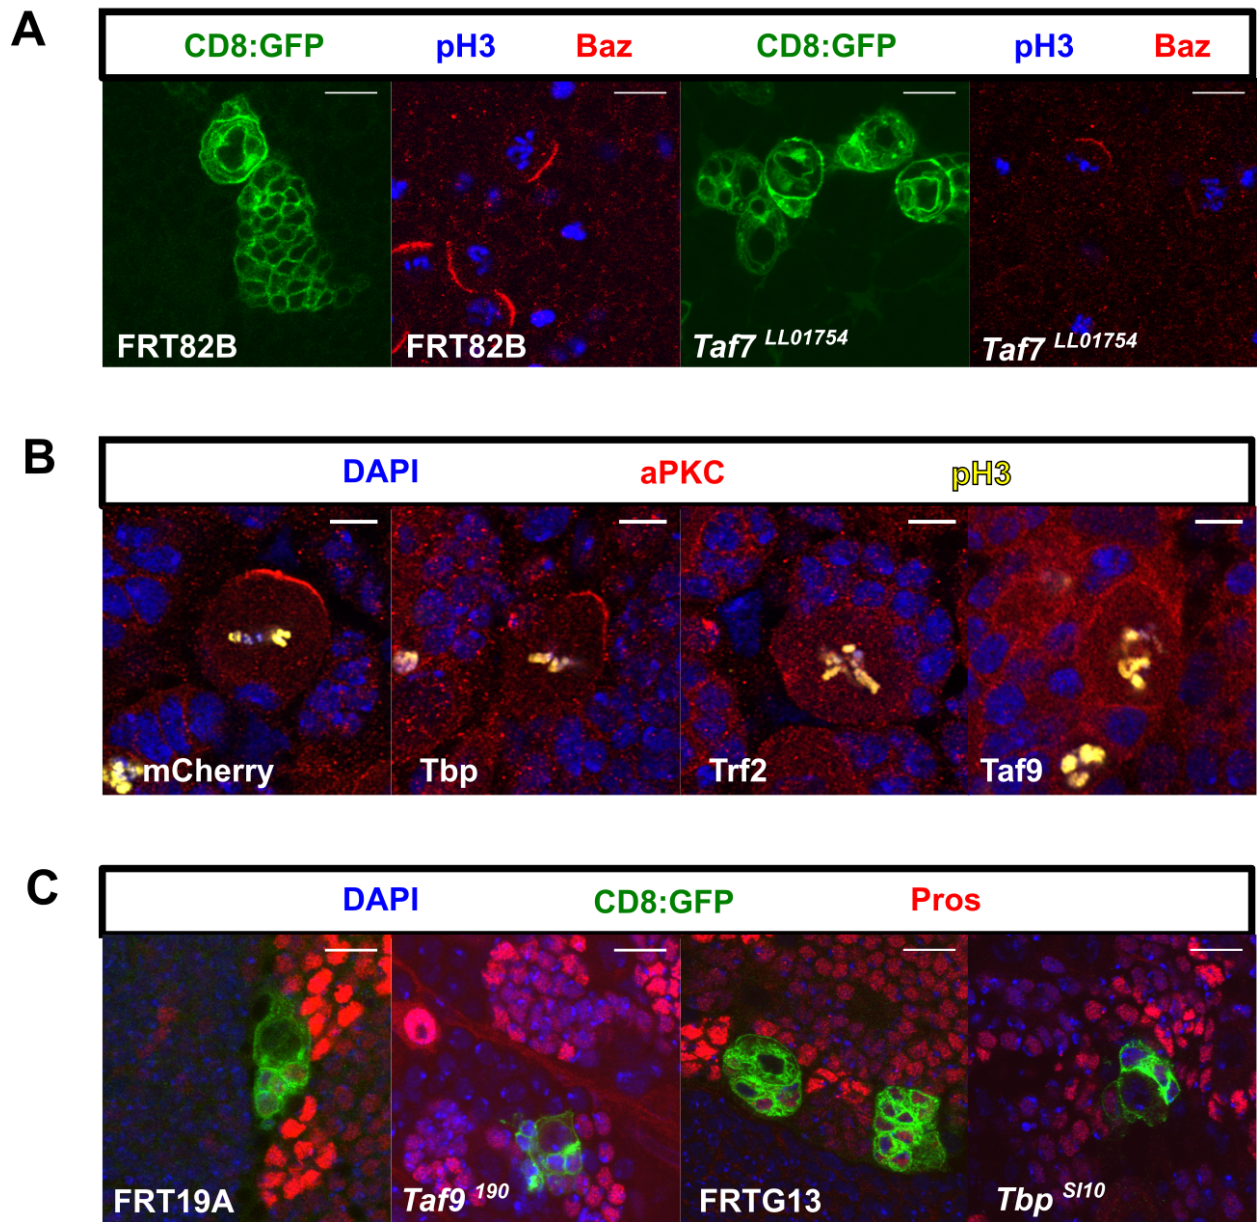

**Figure S4. Analysis of NSC cell polarity and differentiation markers.** (A) The NSC polarity marker Baz exhibits defective localization in a subset of *Taf7<sup>LL01754</sup>* mutant NSCs. Control (FRT82B) or mutant (*Taf7<sup>LL01754</sup>*) clones are marked with a membrane-tethered GFP, CD8:GFP. (B) The NSC polarity marker aPKC exhibits defective localization in a subset of NSCs depleted for TBP, TRF2 and TAF9. (C) *Taf9<sup>190</sup>* or *Tbp<sup>S110</sup>* mutant NSCs do not accumulate Prospero in the nucleus. Control (FRT19A or FRTG13) or mutant (*Taf9<sup>190</sup>* or *Tbp<sup>S110</sup>*) clones are marked with a membrane-tethered GFP, CD8:GFP. Scale bars represent 20  $\mu\text{m}$  in A and 10  $\mu\text{m}$  in B-D.

Figure S5

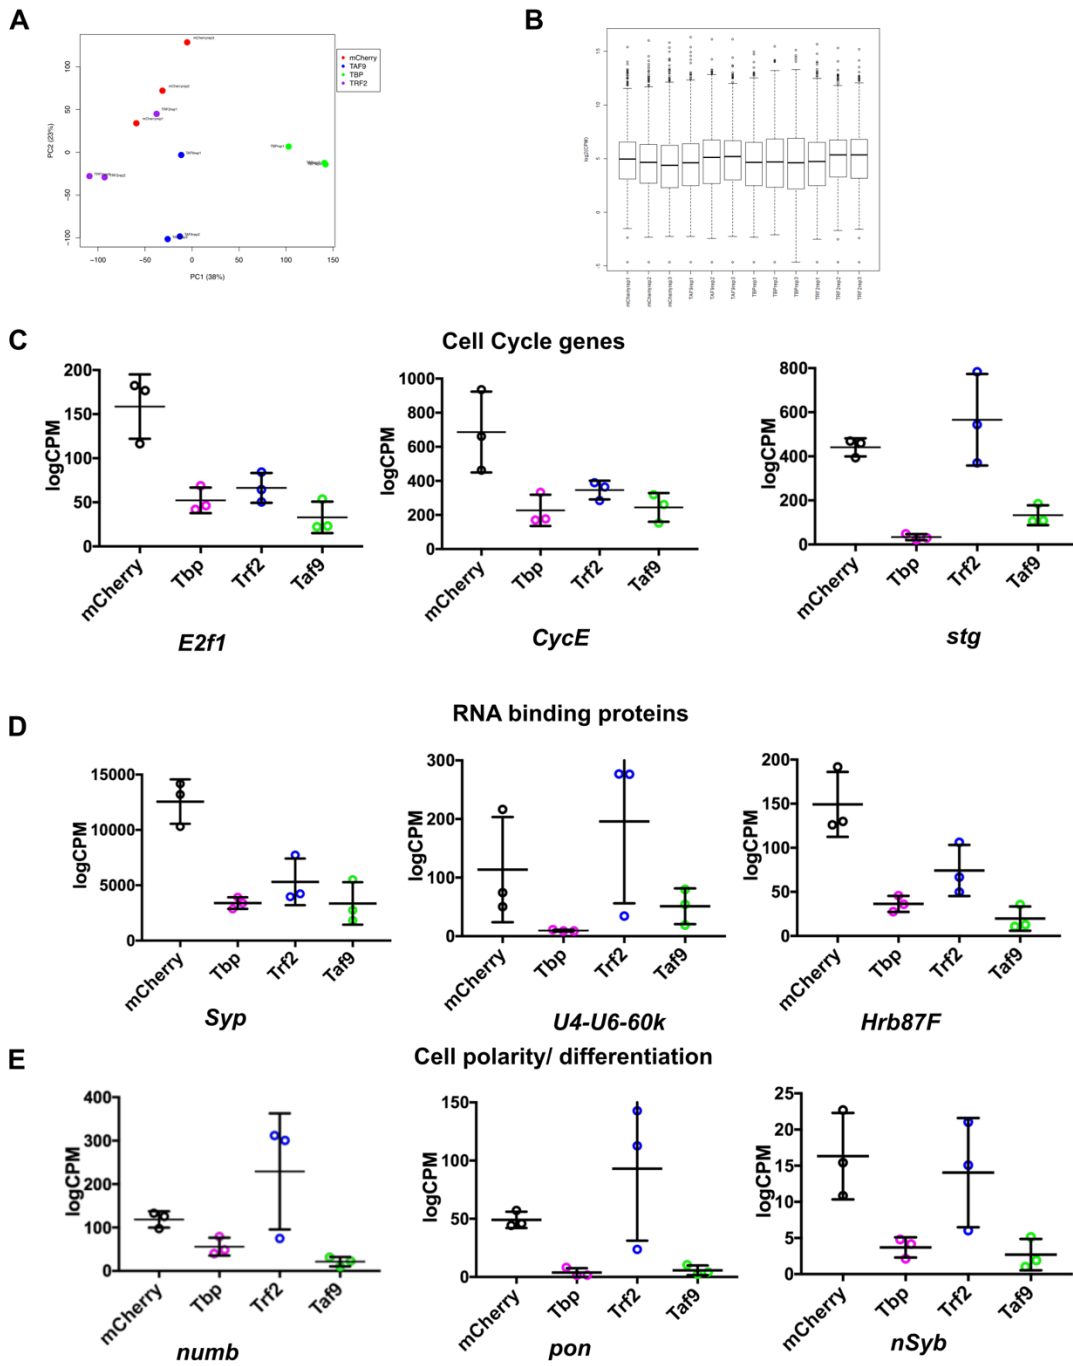

**Figure S5. RNA-seq analysis of FACS-purified NSCs.** (A) Principal component analysis of three replicates for each genotype. (B) Box plot depicting normalized reads for three replicates for each genotype. (C) Normalized reads for selected cell cycle genes (*E2f1*, *CycE*, *stg*) in FACS-purified NSCs expressing either control (mCherry), TBP, TRF2 or TAF9 RNAi transgenes. (D) Normalized reads for selected genes encoding RNA binding proteins (*Syp*, *U4-U6-60k*, *Hrb87F*) in FACS-purified NSCs expressing either control (mCherry), TBP, TRF2 or TAF9 RNAi transgenes. (E) Normalized reads for selected differentiation-associated genes (*numb*, *pon*, *nSyb*) in FACS-purified NSCs expressing either control (mCherry), TBP, TRF2 or TAF9 RNAi transgenes.



Figure S6

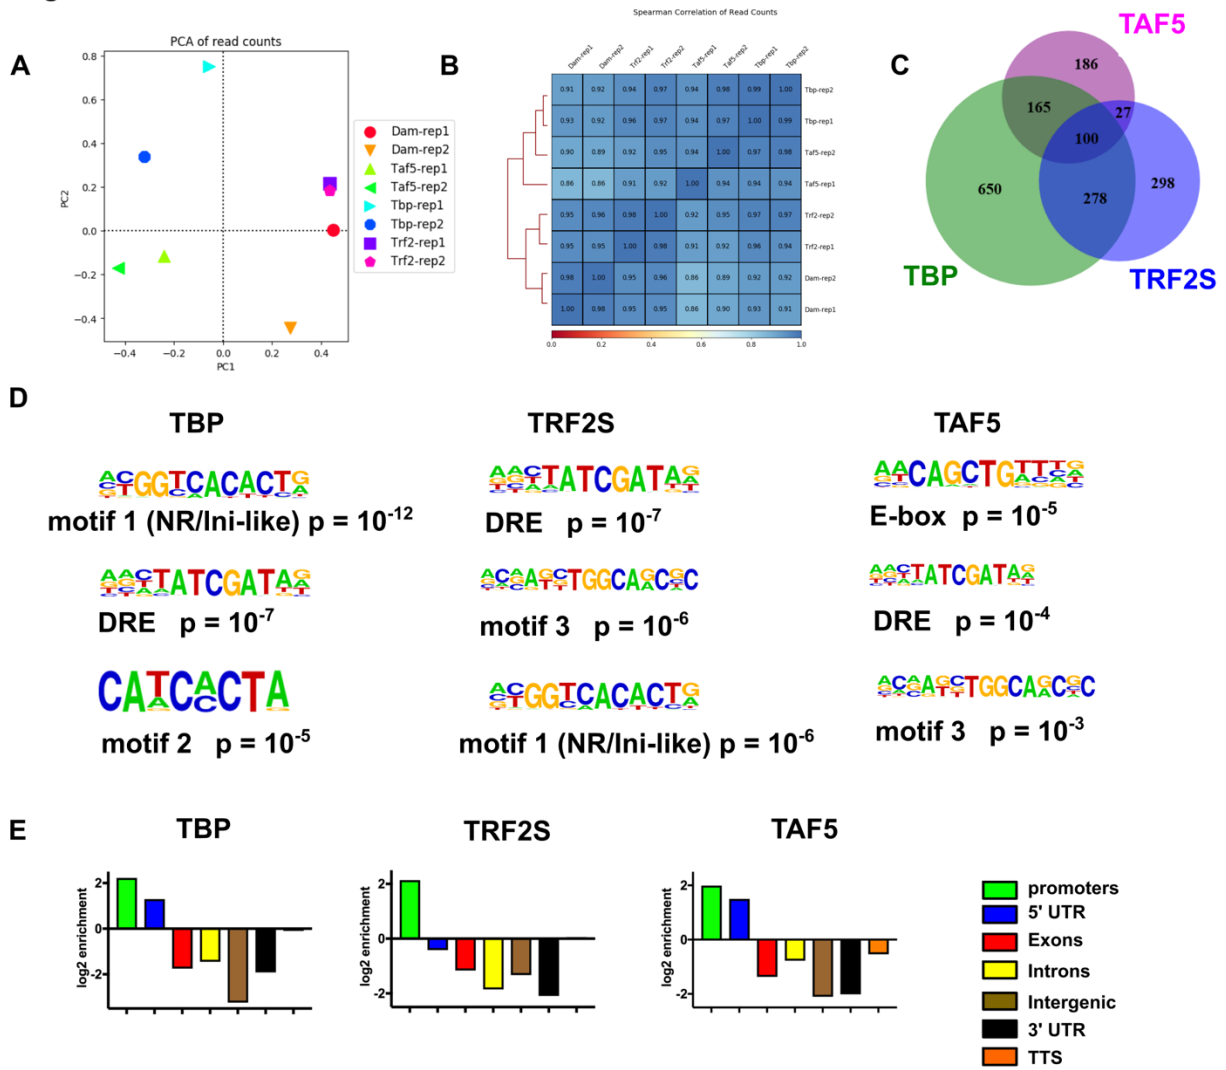

**Figure S6. DamID-seq analysis for Dam-TBP, Dam-TRF2S and Dam-TAF5.** (A)

Principal component analysis and (B) Spearman correlation of read counts for each of the two replicates for the four Dam proteins (Dam alone, Dam-TBP, Dam-TRF2S, Dam-TAF5). (C) Venn diagram showing the statistically significant overlap between genes with TSS-associated peaks that were common to both replicates. (D) Motif enrichment analysis using HOMER of peaks that were common to both replicates. (E) Genomic distribution of regions bound by Dam-TBP, Dam-TRF2S and Dam-TAF5 in both replicates shows enriched binding at promoters and 5'UTRs. Plots show log<sub>2</sub> enrichment scores (observed/expected).

**Table S1.** List of RNAi lines used and phenotype description.

[Click here to Download Table S1](#)

**Table S2.** List of NSC-expressed genes and identification of differentially expressed genes upon TBP knockdown.

[Click here to Download Table S2](#)

**Table S3.** List of NSC-expressed genes and identification of differentially expressed genes upon TRF2 knockdown.

[Click here to Download Table S3](#)

**Table S4.** List of NSC-expressed genes and identification of differentially expressed genes upon TAF9 knockdown.

[Click here to Download Table S4](#)

**Table S5.** Gene ontology analysis of genes downregulated upon TBP knockdown.

[Click here to Download Table S5](#)

**Table S6.** Gene ontology analysis of genes downregulated upon TAF9 knockdown.

[Click here to Download Table S6](#)
